# Supplementary material for: Grape Skin Composting Process to Recycle Food Waste: Kinetics and Optimization
Source: MDPI journal article supplement (doi:10.3390/foods13060824), 2024-03-07
Supplement: s1 [file s1]

**Table S1.** Mean values of selected compost physicochemical properties during composting process with different initial moisture content and different aeration rate. <sup>A-i</sup>The same superscript capital letters within a row denote no significant differences ( $P > 0.05$ ) between the values obtained for the different composting processes according to Tukey's ANOVA. <sup>a-i</sup>. The same superscript lowercase letters within a column denote no significant differences ( $P > 0.05$ ) between values obtained for different days of composting process according to Tukey's ANOVA.

|                |    | R1                          | R2                          | R3                          | R4                          | R5                          | R6                          | R7                          | R8                          | R9                          |
|----------------|----|-----------------------------|-----------------------------|-----------------------------|-----------------------------|-----------------------------|-----------------------------|-----------------------------|-----------------------------|-----------------------------|
| Moisture       | 0  | 52.321±0.309 <sup>A,a</sup> | 52.321±0.309 <sup>A,a</sup> | 64.920±0.418 <sup>B,a</sup> | 64.920±0.418 <sup>B,a</sup> | 64.920±0.418 <sup>B,a</sup> | 52.807±1.402 <sup>A,a</sup> | 60.607±1.929 <sup>B,a</sup> | 60.607±1.929 <sup>B,a</sup> | 60.607±1.929 <sup>B,a</sup> |
|                | 4  | 51.615±0.666 <sup>A,a</sup> | 52.337±3.482 <sup>A,a</sup> | 61.375±2.073 <sup>B,a</sup> | 61.585±5.162 <sup>B,a</sup> | 64.153±0.844 <sup>B,a</sup> | 50.991±1.236 <sup>A,a</sup> | 58.864±1.292 <sup>B,a</sup> | 64.462±0.813 <sup>B,a</sup> | 63.167±0.529 <sup>B,a</sup> |
|                | 8  | 51.472±1.327 <sup>A,a</sup> | 52.579±0.633 <sup>A,a</sup> | 65.418±0.620 <sup>B,a</sup> | 63.628±0.995 <sup>B,a</sup> | 63.121±0.432 <sup>B,a</sup> | 60.032±0.428 <sup>B,b</sup> | 64.582±1.362 <sup>B,a</sup> | 63.675±1.531 <sup>B,a</sup> | 65.267±1.725 <sup>B,a</sup> |
|                | 12 | 54.133±0.093 <sup>A,a</sup> | 52.931±3.006 <sup>A,a</sup> | 66.411±0.254 <sup>B,a</sup> | 67.414±0.818 <sup>B,a</sup> | 65.518±2.846 <sup>B,a</sup> | 57.157±0.771 <sup>A,a</sup> | 67.687±1.358 <sup>B,b</sup> | 60.771±0.768 <sup>B,a</sup> | 65.160±0.987 <sup>B,a</sup> |
|                | 16 | 55.650±2.135 <sup>A,a</sup> | 54.521±0.916 <sup>A,a</sup> | 65.118±2.275 <sup>B,a</sup> | 64.579±0.126 <sup>B,a</sup> | 64.524±1.803 <sup>B,a</sup> | 63.216±2.062 <sup>B,b</sup> | 68.264±0.431 <sup>B,b</sup> | 61.676±0.488 <sup>B,a</sup> | 67.716±0.490 <sup>B,b</sup> |
|                | 20 | 55.753±1.272 <sup>A,a</sup> | 53.602±0.994 <sup>A,a</sup> | 68.570±1.812 <sup>B,b</sup> | 66.747±3.639 <sup>B,a</sup> | 66.310±0.261 <sup>B,a</sup> | 60.021±0.660 <sup>B,b</sup> | 65.385±1.729 <sup>B,a</sup> | 64.625±0.488 <sup>B,a</sup> | 66.088±2.200 <sup>B,a</sup> |
|                | 24 | 56.165±1.330 <sup>A,a</sup> | 56.570±4.242 <sup>A,a</sup> | 69.999±0.765 <sup>B,b</sup> | 66.933±0.079 <sup>B,a</sup> | 67.357±1.167 <sup>B,a</sup> | 62.205±0.540 <sup>B,b</sup> | 64.362±0.333 <sup>B,a</sup> | 64.858±1.991 <sup>B,a</sup> | 64.593±0.445 <sup>B,a</sup> |
|                | 30 | 56.457±0.412 <sup>A,a</sup> | 55.580±0.237 <sup>A,a</sup> | 70.776±0.028 <sup>B,b</sup> | 68.412±0.717 <sup>B,a</sup> | 69.332±0.096 <sup>B,a</sup> | 62.922±0.208 <sup>C,b</sup> | 70.671±0.507 <sup>B,b</sup> | 65.630±2.874 <sup>B,a</sup> | 67.763±1.646 <sup>B,b</sup> |
| Dry matter     | 0  | 47.679±0.309 <sup>A,a</sup> | 47.679±0.309 <sup>A,a</sup> | 35.080±0.419 <sup>B,a</sup> | 35.080±0.419 <sup>B,a</sup> | 35.080±0.419 <sup>B,a</sup> | 47.197±1.402 <sup>A,a</sup> | 39.393±1.929 <sup>B,a</sup> | 39.393±1.929 <sup>B,a</sup> | 39.393±1.929 <sup>B,a</sup> |
|                | 4  | 48.385±0.666 <sup>A,a</sup> | 47.663±3.482 <sup>A,a</sup> | 38.624±2.074 <sup>B,a</sup> | 38.415±5.162 <sup>B,a</sup> | 35.847±0.844 <sup>B,a</sup> | 49.008±1.236 <sup>A,a</sup> | 41.136±1.292 <sup>B,a</sup> | 35.538±0.813 <sup>B,a</sup> | 36.832±0.529 <sup>B,a</sup> |
|                | 8  | 48.528±1.327 <sup>A,a</sup> | 47.421±0.623 <sup>A,a</sup> | 34.582±0.620 <sup>B,a</sup> | 36.372±0.995 <sup>B,a</sup> | 36.878±0.433 <sup>B,a</sup> | 39.967±0.428 <sup>B,b</sup> | 35.417±1.362 <sup>B,a</sup> | 36.325±1.531 <sup>B,a</sup> | 34.733±1.752 <sup>B,a</sup> |
|                | 12 | 45.866±0.092 <sup>A,a</sup> | 47.069±3.007 <sup>A,a</sup> | 33.588±0.253 <sup>B,a</sup> | 32.586±0.818 <sup>B,a</sup> | 34.482±2.847 <sup>B,a</sup> | 42.842±0.770 <sup>A,a</sup> | 32.313±1.358 <sup>B,b</sup> | 39.229±0.768 <sup>C,a</sup> | 34.839±0.987 <sup>B,a</sup> |
|                | 16 | 44.349±2.135 <sup>A,a</sup> | 45.479±0.916 <sup>A,a</sup> | 34.882±2.275 <sup>B,a</sup> | 35.421±0.125 <sup>B,a</sup> | 35.476±1.804 <sup>B,a</sup> | 36.784±2.062 <sup>B,b</sup> | 31.736±0.431 <sup>B,b</sup> | 38.324±0.488 <sup>B,a</sup> | 32.284±0.490 <sup>B,b</sup> |
|                | 20 | 44.247±1.272 <sup>A,a</sup> | 46.398±0.995 <sup>A,a</sup> | 31.430±1.812 <sup>B,a</sup> | 37.252±3.623 <sup>B,a</sup> | 33.690±0.26 <sup>B,a</sup>  | 39.978±0.660 <sup>A,b</sup> | 34.615±1.729 <sup>B,a</sup> | 35.374±0.860 <sup>B,a</sup> | 33.912±2.200 <sup>B,a</sup> |
|                | 24 | 46.435±2.964 <sup>A,a</sup> | 43.429±4.242 <sup>A,a</sup> | 35.001±0.759 <sup>B,a</sup> | 35.066±0.079 <sup>B,a</sup> | 32.643±1.167 <sup>B,a</sup> | 37.795±0.540 <sup>B,b</sup> | 35.638±0.333 <sup>B,a</sup> | 38.142±1.991 <sup>B,a</sup> | 35.407±0.446 <sup>B,a</sup> |
|                | 30 | 43.512±0.412 <sup>A,a</sup> | 44.419±0.237 <sup>A,a</sup> | 29.226±0.023 <sup>B,a</sup> | 33.588±0.717 <sup>B,a</sup> | 30.668±0.097 <sup>B,a</sup> | 37.077±0.208 <sup>B,b</sup> | 29.329±0.508 <sup>B,b</sup> | 34.369±2.874 <sup>B,a</sup> | 32.237±1.646 <sup>B,b</sup> |
| Organic matter | 0  | 73.179±0.576 <sup>A,a</sup> | 73.179±0.576 <sup>A,a</sup> | 71.570±0.219 <sup>A,a</sup> | 71.570±0.219 <sup>A,a</sup> | 71.570±0.219 <sup>A,a</sup> | 67.964±1.084 <sup>A,a</sup> | 71.568±2.483 <sup>A,a</sup> | 71.568±2.483 <sup>A,a</sup> | 71.568±2.483 <sup>A,a</sup> |
|                | 4  | 73.078±3.521 <sup>A,a</sup> | 74.283±1.815 <sup>A,a</sup> | 70.051±4.409 <sup>A,a</sup> | 72.587±3.097 <sup>A,a</sup> | 71.765±1.527 <sup>A,a</sup> | 73.931±1.527 <sup>A,a</sup> | 74.285±0.267 <sup>A,a</sup> | 68.568±1.013 <sup>A,a</sup> | 69.351±0.075 <sup>A,a</sup> |
|                | 8  | 72.715±0.761 <sup>A,a</sup> | 72.996±1.125 <sup>A,a</sup> | 71.873±0.479 <sup>A,a</sup> | 74.999±1.048 <sup>A,a</sup> | 74.483±1.499 <sup>A,a</sup> | 72.292±0.144 <sup>A,a</sup> | 72.483±3.991 <sup>A,a</sup> | 70.970±0.452 <sup>A,a</sup> | 69.492±3.798 <sup>A,a</sup> |
|                | 12 | 76.312±3.395 <sup>A,a</sup> | 73.075±3.671 <sup>A,a</sup> | 65.521±2.688 <sup>B,b</sup> | 63.849±0.661 <sup>B,b</sup> | 66.812±4.574 <sup>B,a</sup> | 70.605±1.061 <sup>A,a</sup> | 61.679±0.414 <sup>B,b</sup> | 70.839±1.141 <sup>A,a</sup> | 68.534±1.203 <sup>B,a</sup> |
|                | 16 | 68.742±2.194 <sup>A,a</sup> | 72.719±0.379 <sup>A,a</sup> | 64.394±0.336 <sup>B,b</sup> | 69.842±1.877 <sup>A,a</sup> | 69.087±4.155 <sup>A,a</sup> | 64.802±0.576 <sup>B,a</sup> | 62.104±0.088 <sup>B,b</sup> | 67.743±2.877 <sup>A,a</sup> | 65.337±0.753 <sup>B,b</sup> |
|                | 20 | 71.046±0.503 <sup>A,a</sup> | 71.405±1.032 <sup>A,a</sup> | 63.971±1.484 <sup>B,b</sup> | 69.421±5.201 <sup>A,a</sup> | 69.766±0.537 <sup>A,a</sup> | 68.527±1.081 <sup>A,a</sup> | 60.954±0.954 <sup>B,b</sup> | 67.491±3.128 <sup>A,a</sup> | 66.479±2.067 <sup>A,a</sup> |
|                | 24 | 69.409±1.444 <sup>A,a</sup> | 70.807±4.897 <sup>A,a</sup> | 64.908±0.193 <sup>B,b</sup> | 68.638±0.703 <sup>A,a</sup> | 68.392±3.522 <sup>A,a</sup> | 67.212±3.172 <sup>A,a</sup> | 63.202±2.119 <sup>B,b</sup> | 66.922±2.777 <sup>A,a</sup> | 66.664±1.338 <sup>A,a</sup> |
|                | 30 | 68.785±2.176 <sup>A,a</sup> | 69.273±0.824 <sup>A,a</sup> | 57.319±0.129 <sup>B,c</sup> | 64.576±0.886 <sup>B,b</sup> | 59.316±0.509 <sup>B,b</sup> | 62.924±0.576 <sup>A,a</sup> | 58.263±0.293 <sup>B,b</sup> | 67.221±6.309 <sup>A,a</sup> | 64.944±3.706 <sup>A,b</sup> |

|           |    |                             |                             |                             |                             |                             |                             |                             |                             |                             |
|-----------|----|-----------------------------|-----------------------------|-----------------------------|-----------------------------|-----------------------------|-----------------------------|-----------------------------|-----------------------------|-----------------------------|
| Ash       | 0  | 26.821±0.576 <sup>A,a</sup> | 26.821±0.576 <sup>A,a</sup> | 28.429±0.219 <sup>A,b</sup> | 28.429±0.219 <sup>A,a</sup> | 28.429±0.219 <sup>A,a</sup> | 32.035±1.084 <sup>A,a</sup> | 28.431±2.482 <sup>A,a</sup> | 28.431±2.482 <sup>A,a</sup> | 28.431±2.482 <sup>A,a</sup> |
|           | 4  | 26.921±3.521 <sup>A,a</sup> | 25.716±1.816 <sup>A,a</sup> | 22.949±4.409 <sup>A,b</sup> | 19.912±5.598 <sup>A,b</sup> | 28.234±1.527 <sup>A,a</sup> | 26.068±1.527 <sup>A,a</sup> | 25.714±0.267 <sup>A,a</sup> | 31.432±1.013 <sup>A,a</sup> | 30.649±0.075 <sup>A,a</sup> |
|           | 8  | 17.285±0.760 <sup>A,b</sup> | 17.004±1.125 <sup>A,b</sup> | 15.122±0.479 <sup>A,c</sup> | 25.001±1.048 <sup>A,a</sup> | 25.516±1.499 <sup>A,a</sup> | 27.708±0.144 <sup>B,a</sup> | 27.517±3.990 <sup>B,a</sup> | 29.029±0.453 <sup>B,a</sup> | 30.506±3.798 <sup>B,a</sup> |
|           | 12 | 23.687±3.396 <sup>A,a</sup> | 24.924±3.672 <sup>A,a</sup> | 28.429±0.219 <sup>B,b</sup> | 36.153±0.661 <sup>B,a</sup> | 33.187±4.574 <sup>B,a</sup> | 29.349±1.061 <sup>A,a</sup> | 38.320±0.414 <sup>B,b</sup> | 29.160±1.404 <sup>A,a</sup> | 25.465±1.203 <sup>A,a</sup> |
|           | 16 | 31.258±2.194 <sup>A,a</sup> | 26.280±0.379 <sup>A,a</sup> | 34.478±2.688 <sup>A,b</sup> | 29.735±0.475 <sup>A,a</sup> | 26.912±4.156 <sup>A,a</sup> | 35.197±0.576 <sup>A,a</sup> | 37.895±0.089 <sup>A,b</sup> | 22.667±0.189 <sup>B,a</sup> | 34.662±0.753 <sup>A,a</sup> |
|           | 20 | 28.954±0.503 <sup>A,a</sup> | 22.595±1.033 <sup>A,a</sup> | 35.605±0.337 <sup>A,b</sup> | 30.579±5.201 <sup>A,a</sup> | 30.264±0.537 <sup>A,a</sup> | 31.473±1.081 <sup>A,a</sup> | 39.045±0.955 <sup>B,b</sup> | 32.509±3.129 <sup>A,a</sup> | 33.521±2.066 <sup>A,a</sup> |
|           | 24 | 24.069±3.440 <sup>A,a</sup> | 26.193±4.897 <sup>A,a</sup> | 35.092±0.193 <sup>B,b</sup> | 31.362±0.703 <sup>A,a</sup> | 31.608±3.522 <sup>A,a</sup> | 32.787±3.172 <sup>B,a</sup> | 36.797±0.080 <sup>B,a</sup> | 33.078±2.777 <sup>B,a</sup> | 33.335±1.338 <sup>B,a</sup> |
|           | 30 | 30.682±2.176 <sup>A,a</sup> | 30.726±0.824 <sup>A,a</sup> | 42.688±0.129 <sup>B,a</sup> | 35.423±0.886 <sup>A,a</sup> | 40.684±0.509 <sup>B,a</sup> | 37.078±0.848 <sup>A,a</sup> | 41.736±0.293 <sup>B,b</sup> | 32.779±6.309 <sup>A,a</sup> | 35.056±3.706 <sup>A,a</sup> |
| Carbon    | 0  | 48.8±0.4 <sup>B,b</sup>     | 48.8±0.4 <sup>B,b</sup>     | 49.6±0.4 <sup>A,b</sup>     | 49.6±0.4 <sup>A,b</sup>     | 49.6±0.4 <sup>A,b</sup>     | 47.7±0.4 <sup>B,b</sup>     | 48.1±0.4 <sup>B,a</sup>     | 48.1±0.4 <sup>B,a</sup>     | 48.1±0.4 <sup>B,a</sup>     |
|           | 4  | 50.8±0.4 <sup>A,a</sup>     | 51.8±0.4 <sup>A,a</sup>     | 52.2±0.4 <sup>A,a</sup>     | 50.8±0.4 <sup>B,a</sup>     | 50.9±0.4 <sup>A,a</sup>     | 48.1±0.4 <sup>B,a</sup>     | 47.9±0.4 <sup>B,a</sup>     | 48.5±0.4 <sup>B,a</sup>     | 47.6±0.4 <sup>B,a</sup>     |
|           | 8  | 51.4±0.4 <sup>A,a</sup>     | 51.2±0.4 <sup>A,a</sup>     | 51.5±0.4 <sup>A,a</sup>     | 51.2±0.4 <sup>A,a</sup>     | 51.3±0.4 <sup>A,a</sup>     | 47.9±0.4 <sup>B,a</sup>     | 47.3±0.4 <sup>B,a</sup>     | 48.1±0.4 <sup>B,a</sup>     | 48.0±0.4 <sup>B,a</sup>     |
|           | 12 | 49.0±0.4 <sup>A,b</sup>     | 49.9±0.4 <sup>A,a</sup>     | 48.1±0.4 <sup>A,c</sup>     | 51.4±0.4 <sup>A,a</sup>     | 49.3±0.4 <sup>A,a</sup>     | 44.3±0.4 <sup>B,c</sup>     | 46.8±0.4 <sup>B,a</sup>     | 47.4±0.4 <sup>B,a</sup>     | 46.3±0.4 <sup>B,a</sup>     |
|           | 16 | 48.7±0.4 <sup>A,b</sup>     | 48.4±0.4 <sup>A,b</sup>     | 49.3±0.4 <sup>A,b</sup>     | 49.4±0.4 <sup>A,b</sup>     | 48.3±0.4 <sup>A,b</sup>     | 46.6±0.4 <sup>B,b</sup>     | 47.1±0.4 <sup>B,a</sup>     | 47.7±0.4 <sup>B,a</sup>     | 47.2±0.4 <sup>B,a</sup>     |
|           | 20 | 48.7±0.4 <sup>A,b</sup>     | 48.4±0.4 <sup>A,b</sup>     | 47.1±0.4 <sup>B,c</sup>     | 47.4±0.4 <sup>A,b</sup>     | 47.2±0.4 <sup>B,c</sup>     | 48.1±0.4 <sup>A,a</sup>     | 46.3±0.4 <sup>B,a</sup>     | 48.2±0.4 <sup>A,a</sup>     | 48.0±0.4 <sup>A,a</sup>     |
|           | 24 | 48.3±0.4 <sup>A,b</sup>     | 48.7±0.4 <sup>A,b</sup>     | 47.5±0.4 <sup>A,c</sup>     | 47.3±0.4 <sup>A,b</sup>     | 47.5±0.4 <sup>A,c</sup>     | 47.2±0.4 <sup>A,b</sup>     | 47.0±0.4 <sup>A,a</sup>     | 47.2±0.4 <sup>A,a</sup>     | 47.3±0.4 <sup>A,a</sup>     |
|           | 30 | 48.3±0.4 <sup>A,b</sup>     | 47.7±0.4 <sup>A,b</sup>     | 46.8±0.4 <sup>B,c</sup>     | 47.3±0.4 <sup>A,b</sup>     | 47.3±0.4 <sup>A,c</sup>     | 47.1±0.4 <sup>A,b</sup>     | 44.7±0.4 <sup>A,b</sup>     | 47.3±0.4 <sup>A,a</sup>     | 47.3±0.4 <sup>A,a</sup>     |
| Nitrogen  | 0  | 1.78±0.4 <sup>A,a</sup>     | 1.78±0.4 <sup>A,a</sup>     | 1.27±0.4 <sup>A,a</sup>     | 1.27±0.4 <sup>A,a</sup>     | 1.27±0.4 <sup>A,a</sup>     | 1.54±0.4 <sup>A,a</sup>     | 1.50±0.4 <sup>A,a</sup>     | 1.50±0.4 <sup>A,a</sup>     | 1.50±0.4 <sup>A,a</sup>     |
|           | 4  | 1.86±0.4 <sup>A,a</sup>     | 1.85±0.4 <sup>A,a</sup>     | 1.84±0.4 <sup>A,a</sup>     | 1.73±0.4 <sup>A,a</sup>     | 1.83±0.4 <sup>A,a</sup>     | 1.48±0.4 <sup>A,a</sup>     | 1.57±0.4 <sup>A,a</sup>     | 1.58±0.4 <sup>A,a</sup>     | 1.61±0.4 <sup>A,a</sup>     |
|           | 8  | 1.86±0.4 <sup>A,a</sup>     | 1.93±0.4 <sup>A,a</sup>     | 2.06±0.4 <sup>A,a</sup>     | 1.90±0.4 <sup>A,a</sup>     | 1.84±0.4 <sup>A,a</sup>     | 1.55±0.4 <sup>A,a</sup>     | 1.43±0.4 <sup>A,a</sup>     | 1.61±0.4 <sup>A,a</sup>     | 1.60±0.4 <sup>A,a</sup>     |
|           | 12 | 1.83±0.4 <sup>A,a</sup>     | 1.83±0.4 <sup>A,a</sup>     | 1.96±0.4 <sup>A,a</sup>     | 1.77±0.4 <sup>A,a</sup>     | 1.91±0.4 <sup>A,a</sup>     | 1.96±0.4 <sup>A,a</sup>     | 2.08±0.4 <sup>A,a</sup>     | 1.71±0.4 <sup>A,a</sup>     | 2.56±0.4 <sup>A,a</sup>     |
|           | 16 | 1.82±0.4 <sup>A,a</sup>     | 1.87±0.4 <sup>A,a</sup>     | 1.85±0.4 <sup>A,a</sup>     | 2.01±0.4 <sup>A,a</sup>     | 1.99±0.4 <sup>A,a</sup>     | 2.76±0.4 <sup>A,a</sup>     | 2.31±0.4 <sup>A,a</sup>     | 1.93±0.4 <sup>A,a</sup>     | 2.67±0.4 <sup>A,a</sup>     |
|           | 20 | 1.66±0.4 <sup>A,a</sup>     | 1.72±0.4 <sup>A,a</sup>     | 1.92±0.4 <sup>A,a</sup>     | 1.88±0.4 <sup>A,a</sup>     | 1.77±0.4 <sup>A,a</sup>     | 2.17±0.4 <sup>A,a</sup>     | 2.53±0.4 <sup>A,a</sup>     | 1.80±0.4 <sup>A,a</sup>     | 2.20±0.4 <sup>A,a</sup>     |
|           | 24 | 1.66±0.4 <sup>A,a</sup>     | 1.82±0.4 <sup>A,a</sup>     | 1.90±0.4 <sup>A,a</sup>     | 1.75±0.4 <sup>A,a</sup>     | 1.77±0.4 <sup>A,a</sup>     | 2.36±0.4 <sup>A,a</sup>     | 2.56±0.4 <sup>A,a</sup>     | 1.87±0.4 <sup>A,a</sup>     | 2.19±0.4 <sup>A,a</sup>     |
|           | 30 | 1.57±0.4 <sup>A,a</sup>     | 1.67±0.4 <sup>A,a</sup>     | 1.90±0.4 <sup>A,a</sup>     | 1.87±0.4 <sup>A,a</sup>     | 1.76±0.4 <sup>A,a</sup>     | 2.33±0.4 <sup>A,a</sup>     | 2.84±0.4 <sup>A,a</sup>     | 2.07±0.4 <sup>A,a</sup>     | 2.51±0.4 <sup>A,a</sup>     |
| C/N ratio | 0  | 27.947±6.210 <sup>A,a</sup> | 27.947±6.210 <sup>A,a</sup> | 40.074±7.347 <sup>B,a</sup> | 40.074±7.347 <sup>B,a</sup> | 40.074±7.347 <sup>B,a</sup> | 32.419±8.442 <sup>A,a</sup> | 33.652±9.023 <sup>A,a</sup> | 33.652±9.023 <sup>A,a</sup> | 33.652±9.023 <sup>A,a</sup> |
|           | 4  | 28.164±5.978 <sup>A,a</sup> | 28.883±6.172 <sup>A,a</sup> | 29.276±6.294 <sup>A,b</sup> | 30.672±7.047 <sup>A,b</sup> | 28.711±6.204 <sup>A,b</sup> | 34.154±9.295 <sup>A,a</sup> | 31.875±8.126 <sup>A,a</sup> | 32.052±8.118 <sup>A,a</sup> | 30.818±7.641 <sup>A,a</sup> |
|           | 8  | 28.495±6.052 <sup>A,a</sup> | 27.292±5.568 <sup>A,a</sup> | 25.629±4.873 <sup>A,b</sup> | 27.858±5.781 <sup>A,b</sup> | 28.769±6.204 <sup>A,b</sup> | 32.325±8.358 <sup>A,a</sup> | 34.892±9.860 <sup>A,a</sup> | 31.142±7.724 <sup>A,a</sup> | 31.289±7.813 <sup>A,a</sup> |
|           | 12 | 27.638±5.963 <sup>A,a</sup> | 27.505±5.801 <sup>A,a</sup> | 25.223±5.047 <sup>A,b</sup> | 28.875±6.462 <sup>A,b</sup> | 26.570±5.474 <sup>A,b</sup> | 23.228±4.632 <sup>A,b</sup> | 23.050±4.319 <sup>A,b</sup> | 28.750±6.672 <sup>A,a</sup> | 18.371±2.747 <sup>B,b</sup> |
|           | 16 | 28.628±5.996 <sup>A,a</sup> | 29.603±8.521 <sup>A,a</sup> | 27.487±5.862 <sup>A,b</sup> | 25.225±4.917 <sup>A,b</sup> | 24.925±4.907 <sup>A,b</sup> | 17.111±2.359 <sup>B,b</sup> | 20.789±3.478 <sup>A,b</sup> | 25.424±5.173 <sup>A,a</sup> | 17.933±2.565 <sup>B,b</sup> |
|           | 20 | 30.502±7.319 <sup>A,a</sup> | 27.459±5.957 <sup>A,a</sup> | 25.243±5.162 <sup>A,b</sup> | 25.978±5.436 <sup>A,b</sup> | 27.588±6.164 <sup>A,b</sup> | 22.662±4.066 <sup>A,b</sup> | 18.596±2.817 <sup>B,b</sup> | 27.671±6.075 <sup>A,a</sup> | 22.293±3.936 <sup>A,b</sup> |
|           | 24 | 26.775±5.673 <sup>A,a</sup> | 28.814±6.526 <sup>A,a</sup> | 25.742±5.325 <sup>A,b</sup> | 26.169±6.609 <sup>A,b</sup> | 27.763±6.205 <sup>A,b</sup> | 20.374±3.331 <sup>A,b</sup> | 18.649±2.792 <sup>B,b</sup> | 26.015±5.475 <sup>A,a</sup> | 22.399±3.974 <sup>A,b</sup> |
|           | 30 | 26.142±8.169 <sup>A,a</sup> | 27.125±6.156 <sup>A,a</sup> | 24.673±4.959 <sup>A,b</sup> | 27.174±5.729 <sup>A,b</sup> | 28.168±6.336 <sup>A,b</sup> | 21.041±3.491 <sup>A,b</sup> | 17.365±2.328 <sup>B,b</sup> | 23.960±4.521 <sup>A,b</sup> | 19.438±2.975 <sup>A,b</sup> |

[illegible]

|                      |    |                             |                            |                            |                            |                            |                            |                            |                            |                            |
|----------------------|----|-----------------------------|----------------------------|----------------------------|----------------------------|----------------------------|----------------------------|----------------------------|----------------------------|----------------------------|
| $\Delta E$ (extract) | 2  | 0.691±0.029 <sup>A,a</sup>  | 0.807±0.023 <sup>A,a</sup> | 0.338±0.008 <sup>A,a</sup> | 0.206±0.011 <sup>A,a</sup> | 0.367±0.008 <sup>A,a</sup> | 2.840±0.035 <sup>B,a</sup> | 1.061±0.122 <sup>A,a</sup> | 0.338±0.133 <sup>A,a</sup> | 0.795±0.067 <sup>A,a</sup> |
|                      | 8  | 1.073±0.335 <sup>A,a</sup>  | 0.406±0.276 <sup>A,a</sup> | 0.280±0.005 <sup>A,a</sup> | 0.346±0.005 <sup>A,a</sup> | 0.374±0.002 <sup>A,a</sup> | 2.110±0.166 <sup>B,a</sup> | 4.093±0.181 <sup>C,b</sup> | 3.007±0.123 <sup>D,b</sup> | 2.843±0.237 <sup>B,b</sup> |
|                      | 12 | 1.535±0.0027 <sup>A,b</sup> | 1.429±0.498 <sup>A,a</sup> | 1.342±0.042 <sup>A,b</sup> | 1.080±0.002 <sup>A,b</sup> | 1.757±0.010 <sup>A,b</sup> | 1.775±0.032 <sup>A,b</sup> | 1.447±0.077 <sup>A,a</sup> | 1.315±0.082 <sup>A,c</sup> | 0.983±0.048 <sup>A,a</sup> |
|                      | 16 | 0.789±0.057 <sup>A,a</sup>  | 1.210±0.459 <sup>A,a</sup> | 1.518±0.011 <sup>A,b</sup> | 1.370±0.014 <sup>A,b</sup> | 1.087±0.010 <sup>A,b</sup> | 5.244±0.058 <sup>B,d</sup> | 4.135±0.155 <sup>C,b</sup> | 2.292±0.107 <sup>D,b</sup> | 2.887±0.078 <sup>D,b</sup> |
|                      | 20 | 0.818±0.026 <sup>A,a</sup>  | 0.981±0.041 <sup>A,a</sup> | 1.419±0.015 <sup>A,b</sup> | 1.560±0.006 <sup>A,b</sup> | 1.500±0.028 <sup>A,b</sup> | 2.782±0.043 <sup>B,a</sup> | 0.204±0.060 <sup>A,c</sup> | 0.254±0.010 <sup>A,a</sup> | 2.387±0.157 <sup>B,b</sup> |
|                      | 24 | 1.487±0.003 <sup>A,b</sup>  | 2.040±0.411 <sup>A,b</sup> | 1.813±0.026 <sup>A,b</sup> | 1.913±0.006 <sup>A,c</sup> | 2.022±0.065 <sup>A,c</sup> | 0.572±0.021 <sup>B,c</sup> | 1.642±0.117 <sup>A,a</sup> | 3.283±0.096 <sup>C,b</sup> | 2.148±0.132 <sup>A,c</sup> |
|                      | 30 | 3.427±1.370 <sup>A,c</sup>  | 2.013±0.332 <sup>B,b</sup> | 3.679±0.021 <sup>A,c</sup> | 1.954±0.016 <sup>B,c</sup> | 2.437±0.132 <sup>B,c</sup> | 1.500±0.046 <sup>B,b</sup> | 3.739±0.120 <sup>A,b</sup> | 3.895±0.110 <sup>A,d</sup> | 3.334±1.286 <sup>A,d</sup> |

**Table S2.** Mean values of germination indices during composting process. <sup>A-i</sup>The same superscript capital letters within a row denote no significant differences ( $P > 0.05$ ) between the values obtained for the different composting processes according to Tukey's ANOVA. <sup>a-i</sup>. The same superscript lowercase letters within a column denote no significant differences ( $P > 0.05$ ) between values obtained for different days of composting process according to Tukey's ANOVA.

|    | R1                           | R2                          | R3                           | R4                           | R5                           | R6                           | R7                           | R8                           | R9                            |
|----|------------------------------|-----------------------------|------------------------------|------------------------------|------------------------------|------------------------------|------------------------------|------------------------------|-------------------------------|
| 0  | 56.135±3.850 <sup>A,c</sup>  | 56.135±2.370 <sup>A,b</sup> | 0.000±0 <sup>B,d</sup>       | 0.000±0 <sup>B,d</sup>       | 0.000±0 <sup>B,c</sup>       | 0.000±0 <sup>B,e</sup>       | 0.000±0 <sup>B,d</sup>       | 0.000±0 <sup>B,d</sup>       | 0.000±0 <sup>B,d</sup>        |
| 6  | 88.978±2.629 <sup>B,b</sup>  | 81.458±7.892 <sup>B,a</sup> | 100.031±2.044 <sup>B,a</sup> | 106.904±2.431 <sup>B,b</sup> | 93.198±3.713 <sup>B,b</sup>  | 69.846±2.732 <sup>C,c</sup>  | 80.704±4.993 <sup>B,c</sup>  | 100.650±9.778 <sup>B,c</sup> | 125.742±6.485 <sup>A,b</sup>  |
| 10 | 96.182±13.013 <sup>B,b</sup> | 88.478±5.610 <sup>B,a</sup> | 79.249±3.584 <sup>B,b</sup>  | 79.249±2.431 <sup>B,c</sup>  | 122.260±3.572 <sup>A,a</sup> | 61.461±8.298 <sup>C,c</sup>  | 71.271±4.545 <sup>B,c</sup>  | 139.398±7.228 <sup>A,b</sup> | 76.014±3.994 <sup>B,c</sup>   |
| 16 | 98.507±5.880 <sup>C,b</sup>  | 73.853±7.270 <sup>D,a</sup> | 44.581±3.497 <sup>E,c</sup>  | 89.240±2.251 <sup>C,c</sup>  | 83.944±3.094 <sup>C,b</sup>  | 154.040±7.276 <sup>A,a</sup> | 167.641±8.937 <sup>A,a</sup> | 163.473±5.637 <sup>A,a</sup> | 127.665±7.078 <sup>B,b</sup>  |
| 22 | 116.980±7.294 <sup>B,a</sup> | 87.015±3.908 <sup>C,a</sup> | 94.674±5.473 <sup>B,a</sup>  | 68.477±1.953 <sup>D,c</sup>  | 90.817±3.832 <sup>C,b</sup>  | 110.051±6.409 <sup>B,b</sup> | 134.158±7.723 <sup>A,b</sup> | 131.307±6.897 <sup>A,b</sup> | 65.811±6.841 <sup>D,c</sup>   |
| 26 | 56.958±3.038 <sup>D,c</sup>  | 96.960±9.741 <sup>B,a</sup> | 92.280±3.875 <sup>B,a</sup>  | 109.562±2.411 <sup>B,b</sup> | 80.049±4.196 <sup>C,b</sup>  | 36.684±3.277 <sup>E,d</sup>  | 124.695±5.606 <sup>A,b</sup> | 108.270±4.136 <sup>B,c</sup> | 80.704±7.142 <sup>C,c</sup>   |
| 30 | 96.921±9.547 <sup>D,b</sup>  | 81.627±3.277 <sup>D,a</sup> | 79.295±3.277 <sup>D,b</sup>  | 154.711±1.818 <sup>B,a</sup> | 133.859±4.993 <sup>C,a</sup> | 74.211±5.730 <sup>E,c</sup>  | 147.509±7.392 <sup>C,b</sup> | 147.720±2.875 <sup>C,a</sup> | 202.426±10.565 <sup>A,a</sup> |
